# Supplementary material for: USP44+ Cancer Stem Cell Subclones Contribute to Breast Cancer Aggressiveness by Promoting Vasculogenic Mimicry
Source: Oxford University Press journal article supplement (doi:10.1158/1535-7163.mct-15-0114-t), 2015-07-31
Supplement: 15357163mct150114t-sup-145094_1_supp_2980386_nzdvdz.docx [file 15357163mct150114t-sup-145094_1_supp_2980386_nzdvdz.docx]

Supplementary Table 1: Results of multivariate analysis of independent prognostic factors in patients with breast cancer using Cox regression.

| Factor Overall survival Disease free survival | | | | |
| --- | --- | --- | --- | --- |
| Hazard ratio (95% CI) P value Hazard ratio (95% CI) P value | | | | |
| USP44+ CSCs subclones | 3.507 (1.692 to 7.272) | 0.001* | 3.085 (1.723 to 5.524) | 0.0002* |
| Lymph node (positive) | 3.593 (2.146 to 6.017) | 0.000001* | 4.676 (2.839 to 7.701) | 1.37E-9* |
| Her2 (positive)  Age (<50 years)  Tumor size  Advanced tumor stage  High differentiation grade  ER (positive)  PR (positive)  CA (positive)  VM (positive) | 1.669 (1.154 to 2.414)  0.568 (0.225 to 1.430)  0.724 (0.348 to 1.503)  1.076 (0.469 to 2.468)  1.378 (0.732 to 2.592)  1.421 (0.774 to 2.608)  0.695 (0.384 to 1.260)  1.259 (0.534 to 2.970)  0.792 (0.313 to 2.006) | 0.007*  0.230  0.386  0.863  0.321  0.257  0.231  0.598  0.623 | 1.049 (0.748 to 1.472)  0.437 (0.230 to 0.832)  0.899 (0.459 to 1.759)  1.104 (0.522 to 2.335)  1.091 (0.636 to 1.869)  0.908 (0.537 to 1.536)  1.164 (0.688 to 1.970)  1.224 (0.566 to 2.643)  1.494 (0.640 to 3.486) | 0.780  0.012*  0.755  0.796  0.752  0.719  0.571  0.608  0.353 |

*Statistically significant (P*<*0.05).
